# Supplementary material
Source: PubMed Central journal article supplement (PMC2704311)

# Effect of prophylactic lamivudine for chemotherapy-associated hepatitis B reactivation in lymphoma: a meta-analysis of published clinical trials and a decision tree addressing prolonged prophylaxis and maintenance

Panayiotis D. Ziakas,<sup>1,2</sup> Petros Karsaliakos,<sup>2</sup> and Eleftherios Mylonakis<sup>1</sup>

<sup>1</sup>Division of Infectious Diseases, Massachusetts General Hospital, Harvard Medical School, Boston, MA, USA, and <sup>2</sup>Hygeia Diagnostic & Therapeutic Center, Athens, Greece

Citation: Ziakas PD, Karsaliakos P, and Mylonakis E. Effect of prophylactic lamivudine for chemotherapy-associated hepatitis B reactivation in lymphoma: a meta-analysis of published clinical trials and a decision tree addressing prolonged prophylaxis and maintenance. *Haematologica* 2009. doi:10.3324/haematol.2009.005819

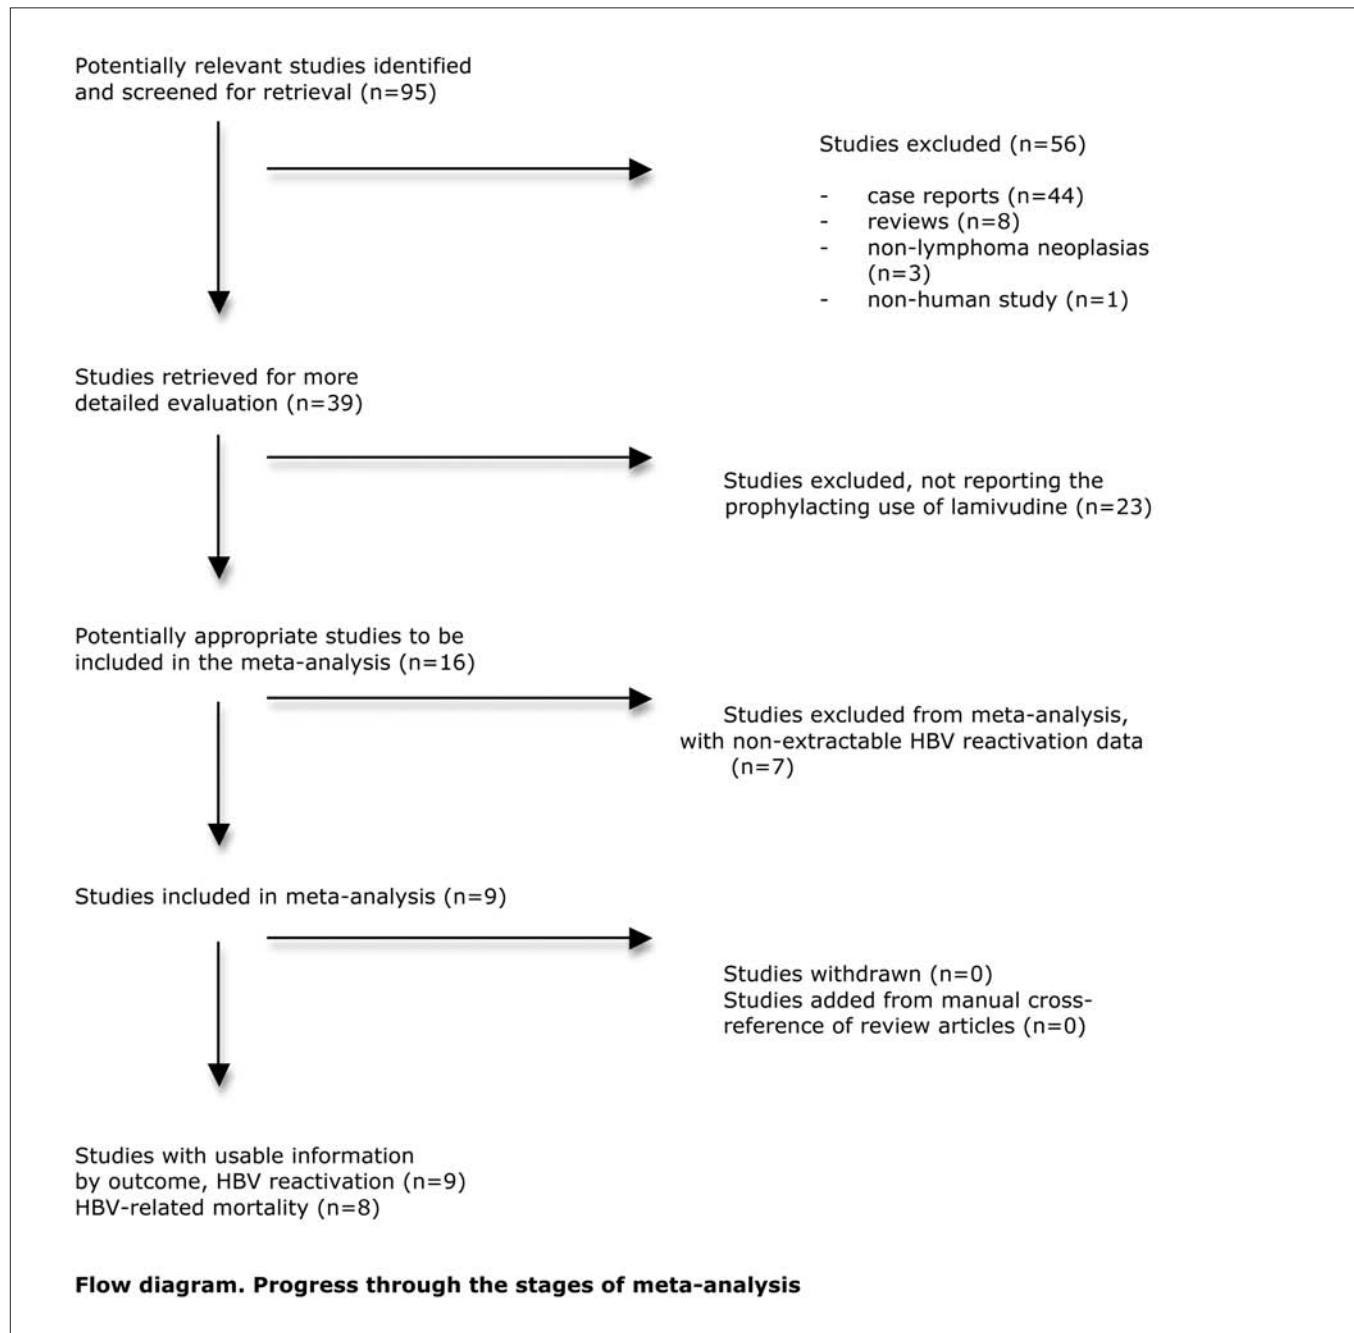

Supplement: 2009.005819_1.pdf [file 2009.005819_1.pdf]
